# Supplementary material
Source: PubMed Central journal article supplement (PMC3831497)
Supplement: 1314145110_pnas.201314145SI.pdf [file 1314145110_pnas.201314145SI.pdf]

# Supporting Information

Theendakara et al. 10.1073/pnas.1314145110

## SI Materials and Methods

**Cell Culture Conditions and Transfections.** All experiments were performed in several different cell lines, some of which required transient transfection of apolipoprotein E (ApoE) isoforms alone and some that required transfections of amyloid precursor protein (APP) and ApoE isoforms. Cell lines included HN33 (mouse hippocampal neuron  $\times$  N18TG2 neuroblastoma), HEK-293T, SH-SY5Y, and H4 human neuroglioma cells that required transient transfection of APP and ApoE isoforms and A172 human glioblastoma cells that expresses APP endogenously that required transient transfection of only ApoE isoforms. Cells were cultured in DMEM containing 10% (vol/vol) FBS and 1% (vol/vol) penicillin/streptomycin. pcDNA3-APP695 was as described previously (1). Human ApoE cDNA constructs were generously provided by Yadong Huang (Gladstone Institute of Cardiovascular Disease, University of California, San Francisco). The PCR product encoding modified ApoE4 $\Delta$  (amino acids 1–272) was subcloned into a pFLAG-CMV-3 vector (Sigma) containing an amino-terminal FLAG fusion peptide with the protein expression being driven by the human cytomegalovirus immediate-early promoter (2–4). All DNA constructs were confirmed by sequence analysis.

Transient transfection of cells with Lipofectamine 2000 (Invitrogen) or FuGENE-6 or X-tremeGENE (both from Roche) was performed as described earlier (5, 6) or according to the manufacturer's instructions. The transfection efficiency using these conditions was about 50–70%. Cells were transfected with ApoE alone or APP/ApoE constructs.

**Cell Extracts, Immunoprecipitation, and Western Blotting.** Following transfection of cells with APP and ApoE isoforms or ApoE isoforms alone, culture media and cell extracts were collected. Whole cell extracts were prepared as described earlier (6, 7). Briefly, cells were collected and resuspended in cell lysis buffer (500 mM Hepes, pH 7.6, 250 mM NaCl, 0.1% Nonidet P-40, 5mM EDTA) containing complete miniprotease inhibitors (Roche). Resuspended cells were sonicated three times for 30 s each, and unbroken cells and membrane debris were removed by centrifugation at 4° for 15 min at 20,000  $\times$  *g*. Typically, 100  $\mu$ g of cell extract was loaded for SDS/PAGE and Western blot analysis as previously described (6, 7). Culture media and cell extracts (150–200  $\mu$ g protein) were subjected to immunoprecipitation (IP) with an N-terminal anti-APP antibody that recognizes soluble amyloid precursor protein alpha (sAPP $\alpha$ ) or 5A3/1G7 mixed monoclonal antibody (recognizing the ectodomain of APP) or anti-CT-15-APP antibody. The immunoprecipitated proteins were subjected to SDS/PAGE and Western blotting (6, 7). Enhanced chemiluminescence detection of the proteins was performed with Pierce ECL detection reagent (Thermo Scientific).

**Antibodies.** The following APP antibodies were used in the present studies: 5A3/1G7 mixed monoclonal antibody (recognizing the ectodomain of APP) (8, 9); APP-CT15 polyclonal antibody (both kindly provided by Edward Koo, University of California, San Diego); APP-6E10 monoclonal antibody (Covance); and N-terminal APP polyclonal antibody (Sigma). Other antibodies included ApoE antibody (Sigma), APP-phosphoThr668 antibody (Cell Signaling), Tau and phosphorylated (p)-Tau antibodies (Invitrogen and Cell Signaling), and SirT antibodies (Cell Signaling). All HRP-conjugated secondary antibodies were purchased from Amersham/GE Healthcare or Santa Cruz Biotechnology.

**sAPP $\alpha$ , sAPP $\beta$ , and A $\beta$  Assay.** sAPP $\alpha$  or sAPP $\beta$  secreted into the cellular media was determined with the AlphaLISA sAPP $\alpha$  and sAPP $\beta$  immunoassay research kits (Perkin Elmer) according to the manufacturer's protocol with some modifications (10, 11). The standards, blanks, and media were diluted with the buffer provided in the kit and added to the plate. During the first incubation step, the analyte was captured either by an antibody recognizing the  $\alpha$ -secretase cleavage site at sAPP $\alpha$  C terminus (clone 2B3) or the sAPP $\beta$  C terminus and by a second biotin-labeled antibody specific to the N-terminal part of sAPP (common for both sAPP $\alpha$  and sAPP $\beta$ ). In the second incubation step, the biotinylated anti-analyte antibody was bound to the streptavidin-coated donor beads. At the end of this reaction, the plates were read on an EnSpire Alpha 2390 multilabel plate reader equipped with the AlphaScreen module. The A $\beta$ 1–42 or 1–40 was determined from media or cells using Invitrogen's sandwich ELISA kit as described previously (10–12). The levels of A $\beta$  were quantified from a standard curve and normalized to total cellular protein.

**Quantitative Real-Time PCR.** To analyze the mRNA levels of Sirtuin T1 (SirT1), Sirt2, and SirT6, real-time PCR was performed on first-strand cDNAs. Primers for SirT1, SirT2, and SirT6 were designed using the Roche universal probe library system; a custom assay and the primers were synthesized by Integrated DNA Technology. Real-time PCR was performed in SYBR Green master mix (Roche) with the corresponding primer sets. A172 cells were transfected with ApoE3 or ApoE4 cDNA, and after 24 h, the cells were trypsinized and collected. Total RNA was isolated using High Pure RNA isolation kit (Roche). RNA concentrations were measured using the NanoDrop ND-1000 spectrophotometer, and 1  $\mu$ g of RNA from untransfected and each transfected sample was reverse transcribed. The real-time PCR cycling was performed on the Light Cycler 480 (Roche) using white Light Cycler480 384-multiwell plates. The melting curves of PCR products were monitored to ensure that a single melting curve was obtained. For analysis of the real-time PCR data,  $\delta$ Ct values of samples were normalized to values obtained for GAPDH, which was assayed simultaneously. Relative quantification using the Delta Delta Ct method was adopted to calculate the relative quantity of SirT1, SirT2, and SirT6 levels.

**Restriction Isotyping of Human ApoE.** We used restriction enzyme isoform genotyping to identify the ApoE alleles as described previously (13, 14). The method involved using primer pairs to amplify the ApoE gene sequence containing amino acid positions 112 and 158. The amplification products were later digested with HhaI and subjected to electrophoresis on polyacrylamide gels. Each of the isoforms was distinguished by a unique combination of HhaI fragment sizes (Fig. S5) that enabled explicit typing of all homozygotic and heterozygotic combinations.

**Human Autopsy Material.** Dissected frozen tissues representing different regions of the brain were provided by Stephen DeArmond (School of Medicine, University of California, San Francisco), and research was conducted in compliance with policies and principles contained in the Federal Policy for the Protection of Human Subjects. Eleven postmortem human brains [five normal and six with Alzheimer's disease (AD)] were used in this study. Limited information (sex, age at death, and pathology status) that was available only on a subset of samples is provided in Table S2. Restriction enzyme isoform genotyping to identify the ApoE

alleles of each sample was performed as described above. Samples for SDS/PAGE and Western blots were prepared as described earlier (15). Samples (100  $\mu$ g) were added to reducing sample buffer and heated for 10 min at 70 °C before subjecting them to SDS/PAGE.

**Surface Plasmon Resonance.** Thioredoxin (trx)-fusion proteins containing ApoE3 (trx-ApoE3) and ApoE4 (trx-ApoE4) was expressed and purified as described previously (16). In addition, four fusion proteins containing different fragments of APP were expressed and purified as described previously (17). *Escherichia coli* thioredoxin (Sigma Chemicals) was purified using size-exclusion chromatography. Proteins were biotinylated using the EZ-Link Sulfo-NHS-SS-Biotin Biotinylation Kit (Thermo Scientific) following the instructions to produce one to two biotins per molecule.

For the ApoE-binding experiments, avidin (Thermo Scientific) was immobilized on a CM5 biacore chip via a standard amine coupling protocol (Biacore Handbook). Biotinylated proteins were loaded onto the chips to create two chips: one with an avidin-only reference channel (FC1), thioredoxin (FC2), ApoE3 (FC3), and ApoE4 (FC4) and one chip with an avidin-only reference channel (FC1), MBP-eAPP<sub>19–624</sub> (FC2, FC3), and eAPP<sub>230–624</sub> (FC4). Nonbiotinylated proteins were also dialyzed against 20 mM phosphate, pH 6.5, 125 mM NaCl, and 0.005% Tween-20 (PBST)

and then concentrated to between 0.5 and 2.0 mg/mL. The last dialysis buffer was filtered with a 22- $\mu$ m filter and used as running buffer in the surface plasmon resonance (SPR) experiments. The maximal saturation for each concentration of protein was estimated by modeling the association phase with either a single phase association or two phase association model in PRISM (Graphpad). The  $K_{D, \text{eff}}$  was calculated using the predicted plateaus for each concentration and a single-binding site model.

For the competition experiment, varying concentrations of disulfiram were incubated with either 0.15 or 0.075  $\mu$ M ApoE4 in 20 mM phosphate, pH 6.5, 125 mM NaCl, and 1% DMSO before being pumped through the chip. For disulfiram-APP binding experiments, Trx-eAPP<sub>575–624</sub> or thioredoxin was coupled to the CM5 biacore chips using standard amine coupling techniques. The disulfiram was diluted from a 10 mM solution in DMSO to 50  $\mu$ M in 1% DMSO, 20 mM sodium phosphate, pH 6.5, 125 mM sodium chloride, and 0.005% Tween and then serially diluted by 1.5 for 10 steps.

**Statistical Analysis.** Statistical significance for all of the tests assessed by calculating the *P* values and defined as *P* < 0.05 was calculated by one-way ANOVA followed by Newman-Keuls multiple comparisons post hoc testing.

- Lu DC, et al. (2000) A second cytotoxic proteolytic peptide derived from amyloid beta-protein precursor. *Nat Med* 6(4):397–404.
- Harris FM, et al. (2003) Carboxyl-terminal-truncated apolipoprotein E4 causes Alzheimer's disease-like neurodegeneration and behavioral deficits in transgenic mice. *Proc Natl Acad Sci USA* 100(19):10966–10971.
- Ye S, et al. (2005) Apolipoprotein (apo) E4 enhances amyloid beta peptide production in cultured neuronal cells: ApoE structure as a potential therapeutic target. *Proc Natl Acad Sci USA* 102(51):18700–18705.
- Huang Y, et al. (2001) Apolipoprotein E fragments present in Alzheimer's disease brains induce neurofibrillary tangle-like intracellular inclusions in neurons. *Proc Natl Acad Sci USA* 98(15):8838–8843.
- Poksay KS, et al. (2011) Valosin-containing protein gene mutations: Cellular phenotypes relevant to neurodegeneration. *J Mol Neurosci* 44(2):91–102.
- Rao RV, et al. (2006) Coupling endoplasmic reticulum stress to the cell-death program: A novel HSP90-independent role for the small chaperone protein p23. *Cell Death Differ* 13(3):415–425.
- Rao RV, et al. (2004) Molecular components of a cell death pathway activated by endoplasmic reticulum stress. *J Biol Chem* 279(1):177–187.
- Banwait S, et al. (2008) C-terminal cleavage of the amyloid-beta protein precursor at Asp664: A switch associated with Alzheimer's disease. *J Alzheimers Dis* 13(1):1–16.
- Galvan V, et al. (2006) Reversal of Alzheimer's-like pathology and behavior in human APP transgenic mice by mutation of Asp664. *Proc Natl Acad Sci USA* 103(18):7130–7135.
- Descamps O, et al. (2013) A $\beta$ PP-Selective BACE Inhibitors (ASBI): Novel Class of Therapeutic Agents for Alzheimer's Disease. *J Alzheimers Dis* 37(2):343–355.
- Libeu CA, Descamps O, Zhang Q, John V, Bredesen DE (2012) Altering APP proteolysis: increasing sAPP $\alpha$  production by targeting dimerization of the APP ectodomain. *PLoS ONE* 7(6):e40027.
- Lourenço FC, et al. (2009) Netrin-1 interacts with amyloid precursor protein and regulates amyloid-beta production. *Cell Death Differ* 16(5):655–663.
- Ingelsson M, et al. (2003) Genotyping of apolipoprotein E: Comparative evaluation of different protocols. *Curr Protoc Hum Genet* 9.14:1–13.
- Hixson JE, Vernier DT (1990) Restriction isotyping of human apolipoprotein E by gene amplification and cleavage with HhaI. *J Lipid Res* 31(3):545–548.
- Nguyen TV, et al. (2008) Signal transduction in Alzheimer disease: p21-activated kinase signaling requires C-terminal cleavage of APP at Asp664. *J Neurochem* 104(4):1065–1080.
- Morrow JA, Arnold KS, Weisgraber KH (1999) Functional characterization of apolipoprotein E isoforms overexpressed in *Escherichia coli*. *Protein Expr Purif* 16(2):224–230.
- Libeu CP, Poksay KS, John V, Bredesen DE (2011) Structural and functional alterations in amyloid- $\beta$  precursor protein induced by amyloid- $\beta$  peptides. *J Alzheimers Dis* 25(3):547–566.







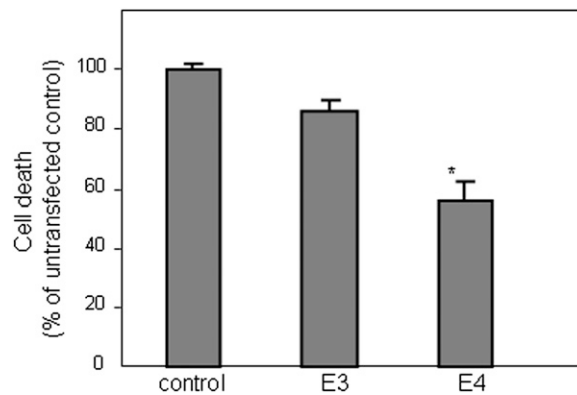

**Fig. S6.** A172 cells were transfected with ApoE isoforms, and 36 h later, cell viability was measured using the MTT (3-(4,5-dimethylthiazol-2-yl)-2,5-diphenyl-tetrazolium bromide, a yellow tetrazole) assay. Surviving and dead cells were counted and data normalized to untreated nontransfected control levels set to 100%. Data (mean  $\pm$  SE) are from three independent experiments performed in triplicate, \* $P < 0.05$ .

**Table S1. Binding parameters derived from surface plasmon resonance for the binding of ApoE3 and ApoE4 for different fragments of the APP ectodomain**

| Surface                    | MW (kDa) | Flow ( $\mu$ L/min)         | MW (kDa)         | Flow rate ( $\mu$ L/min) | $k_D$ ( $s^{-1}$ ) | $K_{D, eff}$ (nm) |
|----------------------------|----------|-----------------------------|------------------|--------------------------|--------------------|-------------------|
| TRX-apoE4                  | 45*      | TRX-eAPP <sub>575-624</sub> | 20               | 45                       | ND                 | >>3,500           |
|                            |          | TRX-eAPP <sub>290-624</sub> | 52               | 45                       | 0.007              | 80 $\pm$ 20       |
| TRX-apoE3                  | 45*      | TRX-eAPP <sub>575-624</sub> | 20               | 45                       | NS                 | NS                |
|                            |          | TRX-eAPP <sub>290-624</sub> | 52               | 45                       | 0.006              | 300 $\pm$ 50      |
| TRX                        | 10       | TRX-eAPP <sub>575-624</sub> | 20               | 45                       | NS                 | NS                |
|                            |          | TRX-eAPP <sub>290-624</sub> | 52               | 45                       | NS                 | NS                |
| MBP-eAPP <sub>19-624</sub> | 127      | TRX-apoE4                   | 180 <sup>†</sup> | 60                       | 0.009              | 370 $\pm$ 40      |
|                            |          | TRX-apoE3                   | 180 <sup>†</sup> | 60                       | 0.010              | 430 $\pm$ 80      |
| eAPP <sub>230-624</sub>    | 45       | TRX-apoE4                   | 180 <sup>†</sup> | 60                       | 0.011              | 720 $\pm$ 120     |
|                            |          | TRX-apoE3                   | 180 <sup>†</sup> | 60                       | 0.010              | 1,000 $\pm$ 67    |

The sensograms corresponding to the table entries are shown in Fig. 2 and Fig. S3. ND, not determined; NS, not significant binding.

\*Molecular weight of the monomer.

<sup>†</sup>Molecular weight estimated by size-exclusion chromatography. This molecular weight is consistent with previous findings that nonlipidated apoE being a tetramer in solution.

**Table S2. Dissected frozen tissues representing different regions of the brain obtained from the Neuropathology Division, University of California, San Francisco**

| Lane number | Patient sample number/sex | Age (y) | ApoE profile | Pathology                                                                            |
|-------------|---------------------------|---------|--------------|--------------------------------------------------------------------------------------|
| 1           | P-1065/M                  | 28      | E2/E4        | Non-AD control-hepatic encephalopathy                                                |
| 2           | P-1254                    | NA      | E2/E3        | Non-AD control                                                                       |
| 3           | P-1302/F                  | 58      | E3/E3        | Non-AD control-diagnosed with frontotemporal dementia and striatonigral degeneration |
| 4           | P-1462                    | NA      | E3/E4        | Non-AD control                                                                       |
| 5           | P-1640                    | NA      | E3/E4        | Non-AD control                                                                       |
| 6           | P-1120                    | NA      | E3/E4        | Alzheimer's disease                                                                  |
| 7           | P-1158                    | NA      | E2/E4        | Alzheimer's disease                                                                  |
| 8           | P-1171/M                  | 83      | E2/E4        | Alzheimer's disease                                                                  |
| 9           | P-1476/F                  | 76      | E2/E4        | Alzheimer's disease                                                                  |
| 10          | P-1516/M                  | 82      | E3/E3        | Alzheimer's disease + diffuse Lewy body disease                                      |
| 11          | P-1565/M                  | 64      | E3/E4        | Alzheimer's disease                                                                  |

F, female; M, male; NA, information not available.
